# Supplementary material
Source: publisher site journal article supplement (https://www.dovepress.com/get_supplementary_file.php?f=302354.docx)
Supplement: Supplementary file 1 [file get_supplementary_file.php]

**Table S1. The components of 68-item frailty index**

| Item | | Variables Score 0 | | | | Score 1 |
| --- | --- | --- | --- | --- | --- | --- |
| 1 | | **Demographic characteristics**  Age (ys) | | | <75 | ≥ 75 |
| 2  3  4  5 | | **Physical health**  How is your health?  Hypertension  Coronary heart disease  Other cardiovascular disease  Chronic obstructive pulmonary disease  Other respiratory disease  Digestive disease  Liver disease  Kidney disease  Cerebrovascular disease  Dementia  Other neurology disease  Mental illness  Diabetes  Osteoarthritis  Cancer  Cataract  Deaf  **Disability**  Limb disability  Intelligence disability  Organ disability  Mental disability  Vision disorder  Hearing impairment  **Clinical syndromes**  Chestache / chest pain  Dizziness  Significant memory decline  Stroke sequelae  Transit glossolalia/aphasia  Repeated joint pain  Insomnia  Fall twice in the past 12 months  Urinary incontinence  Constipation  Spontaneous fracture after 50+  Shortness of breath when activity/edema  **Physical function**   | Eating  Grooming  Dressing  Transferring bed  Bathing  Activity in room  Toileting  Cooking  Managing finances  Driving or using public transportation  Shopping  Walk 250 meters  Cut toenails  Climbing stairs  **Physical fitness test**  Stand for 10 seconds  Stand for 10 seconds (close eyes)  Full tandem stand  Repeated chair stands  Walk 20 meters | | --- | | **Living behavior and social function**  Smoking  Drinking  Exercise  Sleep quality  Doing housework  Still work  Attend social activity | | **Mental health**  Center for Epidemiologic Studies Depression Scale (CES-D)  Life is interesting  Health satisfaction  Life status satisfaction | | Mini-Mental State Examination (MMSE) | | | | Good  No  No  No  No  No  No  No  No  No  No  No  No  No  No  No  No  No  No  No  No  No  No  No  No  No  No  No  No  No  No  No  No  No  No  No  Independent  Independent  Independent  Independent  Independent  Independent  Independent  Independent  Independent  Independent  Independent  Independent  Independent  Independent  Complete  Complete  Complete  Complete  Complete  No  No  Yes  Good  Yes  Full day  Yes  Normal  Yes  Yes  Yes  Normal | Bad (1), general (0.5)  Yes  Yes  Yes  Yes  Yes  Yes  Yes  Yes  Yes  Yes  Yes  Yes  Yes  Yes  Yes  Yes  Yes  Yes  Yes  Yes  Yes  Yes  Yes  Yes  Yes  Yes  Yes  Yes  Yes  Yes  Yes  Yes  Yes  Yes  Yes  Difficulty (0.5), Dependent (1)  Difficulty (0.5), Dependent (1)  Difficulty (0.5), Dependent (1)  Difficulty (0.5), Dependent (1)  Difficulty (0.5), Dependent (1)  Difficulty (0.5), Dependent (1)  Difficulty (0.5), Dependent (1)  Difficulty (0.5), Dependent (1)  Difficulty (0.5), Dependent (1)  Difficulty (0.5), Dependent (1)  Difficulty (0.5), Dependent (1)  Difficulty (0.5), Dependent (1)  Difficulty (0.5), Dependent (1)  Difficulty (0.5), Dependent (1)  Incomplete  Incomplete  Incomplete  Partly complete (0.5), Incomplete (1)  Partly complete (0.5), Incomplete (1)  Ever (0.5), Current (1)  Ever (0.5), Current (1)  Sometimes (0.5), Never (1)  General (0.5), Bad (1)  Sometimes (0.5), Never (1)  Sometimes (0.5), No (1)  No  16-19(0.5), ≥ 20(1)  General (0.5), No (1)  General (0.5), No (1)  General (0.5), No (1)  Abnormal (1) |
|  | | |
|  | |  |

**Table S2. The components of 50-item frailty index**

| Item | | Variables Score 0 | | | | Score 1 |
| --- | --- | --- | --- | --- | --- | --- |
| 1 | | **Demographic characteristics**  Age (ys) | | | <75 | ≥ 75 |
| 2  3  4  5 | | **Physical health**  How is your health?  Hypertension  Coronary heart disease  Chronic obstructive pulmonary disease  Digestive disease  Liver disease  Kidney disease  Cerebrovascular disease  Mental illness  Diabetes  Osteoarthritis  Cancer  **Disability**  Limb disability  Intelligence disability  Organ disability  Vision disorder  Hearing impairment  **Clinical syndromes**  Chestache / chest pain  Dizziness  Fall twice in the past 12 months  Constipation  Shortness of breath when activity/edema  **Physical function**   | Eating  Grooming  Dressing  Transferring bed  Bathing  Activity in room  Toileting  Cooking  Managing finances  Driving or using public transportation  Shopping  Walk 250 meters  Cut toenails  Climbing stairs  **Physical fitness test**  Stand for 10 seconds  Stand for 10 seconds (close eyes)  Full tandem stand  Repeated chair stands  Walk 20 meters | | --- | | **Living behavior and social function**  Smoking  Drinking  Exercise  Sleep quality  Still work  Attend social activity | | **Mental health**  Center for Epidemiologic Studies Depression Scale (CES-D) | | Mini-Mental State Examination (MMSE) | | | | Good  No  No  No  No  No  No  No  No  No  No  No  No  No  No  No  No  No  No  No  No  No  Independent  Independent  Independent  Independent  Independent  Independent  Independent  Independent  Independent  Independent  Independent  Independent  Independent  Independent  Complete  Complete  Complete  Complete  Complete  No  No  Yes  Good  Full day  Yes  Normal  Normal | Bad (1), general (0.5)  Yes  Yes  Yes  Yes  Yes  Yes  Yes  Yes  Yes  Yes  Yes  Yes  Yes  Yes  Yes  Yes  Yes  Yes  Yes  Yes  Yes  Difficulty (0.5), Dependent (1)  Difficulty (0.5), Dependent (1)  Difficulty (0.5), Dependent (1)  Difficulty (0.5), Dependent (1)  Difficulty (0.5), Dependent (1)  Difficulty (0.5), Dependent (1)  Difficulty (0.5), Dependent (1)  Difficulty (0.5), Dependent (1)  Difficulty (0.5), Dependent (1)  Difficulty (0.5), Dependent (1)  Difficulty (0.5), Dependent (1)  Difficulty (0.5), Dependent (1)  Difficulty (0.5), Dependent (1)  Difficulty (0.5), Dependent (1)  Incomplete  Incomplete  Incomplete  Partly complete (0.5), Incomplete (1)  Partly complete (0.5), Incomplete (1)  Ever (0.5), Current (1)  Ever (0.5), Current (1)  Sometimes (0.5), Never (1)  General (0.5), Bad (1)  Sometimes (0.5), No (1)  No  16-19(0.5), ≥ 20(1)  Abnormal (1) |
|  | | |
|  | |  |

**Table S3. The components of 27-item frailty index**

| Item | | Variables Score 0 | | | | Score 1 |
| --- | --- | --- | --- | --- | --- | --- |
| 1 | | **Demographic characteristics**  Age (ys) | | | <75 | ≥ 75 |
| 2  3  4  5 | | **Physical health**  How is your health?  Hypertension  Coronary heart disease  Chronic obstructive pulmonary disease  Digestive disease  Liver disease  Kidney disease  Cerebrovascular disease  Mental illness  Diabetes  Osteoarthritis  Cancer  **Disability**  Limb disability  Vision disorder  Hearing impairment  **Clinical syndromes**  Fall twice in the past 12 months  **Physical function**   | ADL  IADL | | --- | | **Living behavior and social function**  Smoking  Drinking  Exercise  Sleep quality  Still work  Attend social activity | | **Mental health**  Center for Epidemiologic Studies Depression Scale (CES-D) | | Mini-Mental State Examination (MMSE) | | | | Good  No  No  No  No  No  No  No  No  No  No  No  No  No  No  No  Independent  Independent  No  No  Yes  Good  Full day  Yes  Normal  Normal | Bad (1), general (0.5)  Yes  Yes  Yes  Yes  Yes  Yes  Yes  Yes  Yes  Yes  Yes  Yes  Yes  Yes  Yes  Difficulty (0.5), Dependent (1)  Difficulty (0.5), Dependent (1)  Ever (0.5), Current (1)  Ever (0.5), Current (1)  Sometimes (0.5), Never (1)  General (0.5), Bad (1)  Sometimes (0.5), No (1)  No  16-19(0.5), ≥ 20(1)  Abnormal (1) |
|  | | |
|  | |  |

| **Table S4. Comparison of baseline and follow-up of characteristics** | | | | |
| --- | --- | --- | --- | --- |
|  | | **Baseline**  **（n=1808)** | **Followed for 13 years**  **（n=1459)** | **Lose to follow-up (n=349)** |
|  |
| **Sex** |  |  |  |  |  |
|  | **Male** | 872(48.2) | 709(48.6) | 169(48.4) |  |
|  | **Female** | 936(51.8) | 750(51.4) | 180(51.6) |  |
| **Age** |  |  |  |  |  |
|  | **60-69** | 475(26.3) | 357(24.5) | 174(49.9) |  |
|  | **70-79** | 891(49.3) | 728(49.9) | 145(41.5) |  |
|  | **80+** | 442(24.4) | 374(25.6) | 30(8.6) |  |
